# Supplementary material
Source: PubMed Central journal article supplement (PMC10284951)
Supplement: 11764_2022_1294_MOESM1_ESM.pdf [file 11764_2022_1294_MOESM1_ESM.pdf]

**Supplementary Table 1** Breast cancer clinical characteristics of the full DianaWeb cohort and the DianaWeb CoVid-19 pandemic sub-cohort.

| Breast cancer (BC) clinical characteristics | Full DianaWeb cohort <sup>a</sup> | DianaWeb pandemic sub-cohort | <i>p</i>           |
|---------------------------------------------|-----------------------------------|------------------------------|--------------------|
| Years after BC diagnosis <sup>b</sup>       | 7.80 ± 4.82                       | 7.36 ± 5.30                  | 0.214 <sup>d</sup> |
| ≤ 2 years <sup>c</sup>                      | 191 (12.8)                        | 28 (12.5)                    | 1.000 <sup>e</sup> |
| 3–4 years <sup>c</sup>                      | 200 (13.4)                        | 59 (26.3)                    | 0.000 <sup>e</sup> |
| 5–9 years <sup>c</sup>                      | 614 (41.3)                        | 68 (30.4)                    | 0.020 <sup>e</sup> |
| ≥ 10 years <sup>c</sup>                     | 464 (31.2)                        | 66 (29.5)                    | 0.641 <sup>e</sup> |
| Missing data                                | 18 (1.2)                          | 3 (1.3)                      |                    |
| BC laterality                               |                                   |                              |                    |
| Left breast                                 | 757 (50.9)                        | 111 (49.6)                   | 0.829 <sup>e</sup> |
| Right breast                                | 678 (45.6)                        | 104 (46.4)                   | 0.772 <sup>e</sup> |
| Bilateral breast                            | 44 (3.0)                          | 6 (2.7)                      | 1.000 <sup>e</sup> |
| Missing data                                | 8 (0.5)                           | 3 (1.3)                      |                    |
| T categories for BC                         |                                   |                              |                    |
| T0                                          | 15 (1.0)                          | 2 (0.9)                      | 1.000 <sup>e</sup> |
| T1                                          | 69 (4.6)                          | 8 (3.6)                      | 0.604 <sup>e</sup> |
| T1a                                         | 58 (3.9)                          | 10 (4.5)                     | 0.715 <sup>e</sup> |
| T1b                                         | 186 (12.5)                        | 32 (14.3)                    | 0.519 <sup>e</sup> |
| T1c                                         | 504 (33.9)                        | 96 (42.9)                    | 0.014 <sup>e</sup> |
| T1mic                                       | 19 (1.3)                          | 2 (0.9)                      | 1.000 <sup>e</sup> |
| T2                                          | 329 (22.1)                        | 35 (15.6)                    | 0.017 <sup>e</sup> |
| T3                                          | 31 (2.1)                          | 8 (3.6)                      | 0.227 <sup>e</sup> |
| T4                                          | 5 (0.3)                           | 0 (0.0)                      | 1.000 <sup>e</sup> |
| T4b                                         | 5 (0.3)                           | 0 (0.0)                      | 1.000 <sup>e</sup> |
| T4d                                         | 1 (0.1)                           | 0 (0.0)                      | 1.000 <sup>e</sup> |
| Tis                                         | 78 (5.2)                          | 9 (4.0)                      | 0.515 <sup>e</sup> |
| TX                                          | 28 (1.9)                          | 2 (0.9)                      | 0.416 <sup>e</sup> |
| Missing                                     | 159 (10.7)                        | 20 (8.9)                     |                    |
| N categories for BC                         |                                   |                              |                    |
| N0                                          | 726 (48.8)                        | 119 (53.1)                   | 0.450 <sup>e</sup> |
| N0(i-)                                      | 8 (0.5)                           | 1 (0.4)                      | 1.000 <sup>e</sup> |
| N0(i+)                                      | 1 (0.1)                           | 0 (0.0)                      | 1.000 <sup>e</sup> |
| N1                                          | 157 (10.6)                        | 22 (9.8)                     | 0.727 <sup>e</sup> |
| N1a                                         | 148 (10.0)                        | 27 (12.1)                    | 0.410 <sup>e</sup> |
| N1b                                         | 7 (0.5)                           | 0 (0.0)                      | 0.603 <sup>e</sup> |
| N1c                                         | 2 (0.1)                           | 1 (0.4)                      | 0.351 <sup>e</sup> |
| N1mic                                       | 75 (5.0)                          | 7 (3.1)                      | 0.242 <sup>e</sup> |
| N2                                          | 34 (2.3)                          | 5 (2.2)                      | 1.000 <sup>e</sup> |
| N2a                                         | 42 (2.8)                          | 10 (4.5)                     | 0.214 <sup>e</sup> |
| N3                                          | 16 (1.1)                          | 1 (0.4)                      | 0.717 <sup>e</sup> |
| N3a                                         | 29 (2.0)                          | 2 (0.9)                      | 0.420 <sup>e</sup> |
| N3b                                         | 1 (0.1)                           | 0 (0.0)                      | 1.000 <sup>e</sup> |
| NX                                          | 75 (5.0)                          | 10 (4.5)                     | 0.745 <sup>e</sup> |
| Missing                                     | 166 (11.2)                        | 19 (8.5)                     |                    |

**Supplementary Table 1** (Continued)

| Breast cancer (BC) clinical characteristics    | Full DianaWeb cohort <sup>a</sup> | DianaWeb pandemic sub-cohort | <i>p</i>           |
|------------------------------------------------|-----------------------------------|------------------------------|--------------------|
| M categories for BC                            |                                   |                              |                    |
| M0                                             | 465 (31.3)                        | 52 (23.2)                    | 0.007 <sup>e</sup> |
| M1                                             | 29 (2.0)                          | 4 (1.8)                      | 1.000 <sup>e</sup> |
| MX                                             | 732 (49.2)                        | 132 (58.9)                   | 0.006 <sup>e</sup> |
| Missing                                        | 261 (17.6)                        | 36 (16.1)                    |                    |
| Stage groups for breast cancer                 |                                   |                              |                    |
| 0                                              | 48 (3.2)                          | 2 (0.9)                      | 0.036 <sup>e</sup> |
| IA                                             | 446 (30.0)                        | 90 (40.2)                    | 0.008 <sup>e</sup> |
| IB                                             | 43 (2.9)                          | 5 (2.2)                      | 0.669 <sup>e</sup> |
| IIA                                            | 279 (18.8)                        | 44 (19.6)                    | 1.000 <sup>e</sup> |
| IIB                                            | 124 (8.3)                         | 8 (3.6)                      | 0.005 <sup>e</sup> |
| IIIA                                           | 66 (4.4)                          | 16 (7.1)                     | 0.134 <sup>e</sup> |
| IIIB                                           | 8 (0.5)                           | 0 (0.0)                      | 0.608 <sup>e</sup> |
| IIIC                                           | 39 (2.6)                          | 3 (1.3)                      | 0.259 <sup>e</sup> |
| IV                                             | 26 (1.7)                          | 4 (1.8)                      | 1.000 <sup>e</sup> |
| Missing                                        | 408 (27.4)                        | 52 (23.2)                    |                    |
| Tumor grade <sup>c</sup>                       |                                   |                              |                    |
| G1                                             | 152 (10.2)                        | 24 (10.7)                    | 1.000 <sup>e</sup> |
| G2                                             | 605 (40.7)                        | 109 (48.7)                   | 1.145 <sup>e</sup> |
| G3                                             | 520 (35.0)                        | 66 (29.5)                    | 0.024 <sup>e</sup> |
| G4                                             | 4 (0.3)                           | 0 (0.0)                      | 1.000 <sup>e</sup> |
| Gx                                             | 94 (6.3)                          | 22 (9.8)                     | 1.123 <sup>e</sup> |
| Missing data                                   | 112 (7.5)                         | 3 (1.3)                      |                    |
| ER expression <sup>c</sup>                     |                                   |                              |                    |
| Positive                                       | 1179 (79.3)                       | 175 (78.1)                   | 0.836 <sup>e</sup> |
| Missing data                                   | 90 (6.1)                          | 19 (8.5)                     |                    |
| HER2 overexpression/amplification <sup>c</sup> |                                   |                              |                    |
| Positive                                       | 506 (34.0)                        | 90 (40.2)                    | 0.281 <sup>e</sup> |
| Missing data                                   | 244 (16.4)                        | 23 (10.3)                    |                    |
| PR expression <sup>c</sup>                     |                                   |                              |                    |
| Positive                                       | 1042 (70.1)                       | 157 (77.1)                   | 0.786 <sup>e</sup> |
| Missing data                                   | 108 (7.3)                         | 20 (8.9)                     |                    |
| Triple-negative breast cancer <sup>c</sup>     |                                   |                              |                    |
| Yes                                            | 353 (23.7)                        | 63 (28.1)                    | 0.338 <sup>e</sup> |
| Missing data                                   | 279 (18.8)                        | 32 (14.3)                    |                    |

<sup>a</sup> Subjects of the DianaWeb pandemic sub-cohort not included.

<sup>b</sup> Results expressed as the mean  $\pm$  SD.

<sup>c</sup> Results expressed as the number of subjects, percentage between brackets.

<sup>d</sup> Student's *t* test: full DianaWeb cohort vs DianaWeb pandemic sub-cohort.

<sup>e</sup>  $\chi^2$  test: full DianaWeb cohort vs DianaWeb pandemic sub-cohort.

**Supplementary Table 2** Sleep habits and smoking status at baseline and immediately before, during, and after lockdown periods in the DianaWeb pandemic sub-cohort.

|                                        | Baseline      | Before CoViD-19 pandemic | During lockdown periods | After lockdown periods |
|----------------------------------------|---------------|--------------------------|-------------------------|------------------------|
| Difficulty falling asleep <sup>a</sup> | 50 (22.3)     | 37 (16.5)                | 47 (21.0)               | 40 (17.9)              |
| Repeated awakenings <sup>a</sup>       | 116 (51.8)    | 102 (45.5)               | 92 (41.1)               | 110 (49.1)             |
| Smoking status <sup>b</sup>            |               |                          |                         |                        |
| Current                                | 13 (5.8)      | 11 (4.9)                 | 11 (4.9)                | 12 (5.4)               |
| Cigarettes/day                         | 20.15 ± 14.69 | 28.27 ± 18.28            | 23.36 ± 16.19           | 27.25 ± 19.10          |

<sup>a</sup> Results expressed as the number of subjects, percentage between brackets.

**Supplementary Table 3** Factors associated with Physical Activity (PA) at baseline and during the Italian CoViD-19 pandemic in the DianaWeb sub-cohort.

|                                            | $\beta$ -coefficients (95% CI) |                          |                         |                        |
|--------------------------------------------|--------------------------------|--------------------------|-------------------------|------------------------|
|                                            | Baseline                       | Before CoViD-19 pandemic | During lockdown periods | After lockdown periods |
| Years from enrolment in the DianaWeb study |                                |                          |                         |                        |
| ≤ 2 years <sup>a</sup>                     | ---                            | 1                        | 1                       | 1                      |
| 3-4 years                                  | ---                            | 0.994 (0.986-1.002)      | 0.824 (0.816-0.831)     | 1.098 (1.090-1.106)    |
| ≥5 years                                   | ---                            | 1.318 (1.305-1.330)      | 1.410 (1.397-1.424)     | 1.472 (1.460-1.484)    |
| Area of residence                          |                                |                          |                         |                        |
| Northern Italy <sup>a</sup>                | 1                              | 1                        | 1                       | 1                      |
| Central Italy                              | 1.183 (1.169-1.197)            | 1.114 (1.102-1.126)      | 1.293 (1.276-1.310)     | 1.091 (1.081-1.102)    |
| Southern Italy                             | 0.937 (0.923-0.952)            | 1.140 (1.126-1.153)      | 1.340 (1.326-1.354)     | 1.031 (1.019-1.043)    |
| Age                                        |                                |                          |                         |                        |
| Young adults (aged 21–40) <sup>a</sup>     | 1                              | 1                        | 1                       | 1                      |
| Adults (aged 41–60)                        | 1.583 (1.546-1.621)            | 1.588 (1.555-1.621)      | 1.037 (1.018-1.057)     | 1.592 (1.560-1.623)    |
| Over 60 aged                               | 1.679 (1.638-1.722)            | 1.120 (1.095-1.146)      | 0.760 (0.744-0.775)     | 1.480 (1.450-1.511)    |
| Marital status                             |                                |                          |                         |                        |
| Never married <sup>a</sup>                 | 1                              | 1                        | 1                       | 1                      |
| Widowed                                    | 1.413 (1.379-1.447)            | 0.885 (0.859-0.912)      | 1.441 (1.402-1.480)     | 1.462 (1.428-1.496)    |
| Separated/divorced                         | 0.892 (0.876-0.909)            | 1.170 (1.152-1.188)      | 1.868 (1.841-1.896)     | 1.613 (1.592-1.634)    |
| Married                                    | 1.120 (1.109-1.131)            | 1.049 (1.041-1.058)      | 1.102 (1.092-1.113)     | 1.343 (1.332-1.353)    |
| Education level                            |                                |                          |                         |                        |
| First level <sup>a</sup>                   | 1                              | 1                        | 1                       | 1                      |
| Second level                               | 0.608 (0.599-0.617)            | 0.765 (0.753-0.778)      | 1.206 (1.181-1.231)     | 1.016 (1.001-1.032)    |
| Higher education                           | 0.684 (0.674-0.695)            | 1.097 (1.079-1.116)      | 1.347 (1.319-1.376)     | 1.516 (1.493-1.539)    |
| Triple-negative breast cancer              |                                |                          |                         |                        |
| No <sup>a</sup>                            | 1                              | 1                        | 1                       | 1                      |
| Yes                                        | 1.078 (1.059-1.098)            | 1.456 (1.435-1.477)      | 1.147 (1.128-1.166)     | 1.881 (1.860-1.902)    |

<sup>a</sup>Reference category.

**Supplementary Table 4** Factors associated with MD score at baseline and during the Italian CoViD-19 pandemic in the DianaWeb sub-cohort.

|                                            | $\beta$ -coefficients (95% CI) |                          |                         |                        |
|--------------------------------------------|--------------------------------|--------------------------|-------------------------|------------------------|
|                                            | Baseline                       | Before CoViD-19 pandemic | During lockdown periods | After lockdown periods |
| Years from enrolment in the DianaWeb study |                                |                          |                         |                        |
| ≤ 2 years <sup>a</sup>                     | ---                            | 1                        | 1                       | 1                      |
| 3-4 years                                  | ---                            | 0.987 (0.896-1.088)      | 0.993 (0.900-1.095)     | 0.961 (0.872-1.059)    |
| ≥5 years                                   | ---                            | 1.002 (0.890-1.128)      | 0.979 (0.867-1.105)     | 0.978 (0.868-1.101)    |
| Area of residence                          |                                |                          |                         |                        |
| Northern Italy <sup>a</sup>                | 1                              | 1                        | 1                       | 1                      |
| Central Italy                              | 1.062 (0.923-1.222)            | 0.986 (0.866-1.123)      | 1.051 (0.924-1.197)     | 1.011 (0.888-1.152)    |
| Southern Italy                             | 1.050 (0.885-1.246)            | 0.978 (0.835-1.146)      | 0.992 (0.846-1.164)     | 0.986 (0.842-1.156)    |
| Age                                        |                                |                          |                         |                        |
| Young adults (aged 21–40) <sup>a</sup>     | 1                              | 1                        | 1                       | 1                      |
| Adults (aged 41–60)                        | 0.881 (0.702-1.106)            | 0.990 (0.784-1.250)      | 0.932 (0.753-1.152)     | 0.916 (0.742-1.132)    |
| Over 60 aged                               | 0.936 (0.733-1.196)            | 0.977 (0.787-1.212)      | 0.958 (0.761-1.206)     | 0.943 (0.750-1.186)    |
| Marital status                             |                                |                          |                         |                        |
| Never married <sup>a</sup>                 | 1                              | 1                        | 1                       | 1                      |
| Widowed                                    | 0.939 (0.671-1.314)            | 0.917 (0.672-1.250)      | 0.935 (0.687-1.273)     | 0.905 (0.663-1.236)    |
| Separated/divorced                         | 1.018 (0.830-1.249)            | 1.062 (0.884-1.276)      | 0.933 (0.770-1.130)     | 0.977 (0.809-1.181)    |
| Married                                    | 0.955 (0.853-1.070)            | 0.953 (0.859-1.056)      | 0.932 (0.840-1.034)     | 0.968 (0.872-1.073)    |
| Education level                            |                                |                          |                         |                        |
| First level <sup>a</sup>                   | 1                              | 1                        | 1                       | 1                      |
| Second level                               | 0.984 (0.797-1.216)            | 0.978 (0.807-1.186)      | 1.012 (0.830-1.234)     | 0.929 (0.768-1.124)    |
| Higher education                           | 1.014 (0.816-1.259)            | 1.038 (0.852-1.265)      | 1.048 (0.855-1.284)     | 0.982 (0.807-1.194)    |
| Triple-negative breast cancer              |                                |                          |                         |                        |
| No <sup>a</sup>                            | 1                              | 1                        | 1                       | 1                      |
| Yes                                        | 1.102 (0.885-1.371)            | 0.095 (0.900-1.333)      | 1.088 (0.890-1.330)     | 1.171 (0.965-1.422)    |

<sup>a</sup> Reference category.

**Supplementary Table 5** Factors associated with WCRF score at baseline and during the Italian CoViD-19 pandemic in the DianaWeb sub-cohort.

|                                            | $\beta$ -coefficients (95% CI) |                          |                         |                        |
|--------------------------------------------|--------------------------------|--------------------------|-------------------------|------------------------|
|                                            | Baseline                       | Before CoViD-19 pandemic | During lockdown periods | After lockdown periods |
| Years from enrolment in the DianaWeb study |                                |                          |                         |                        |
| ≤ 2 years <sup>a</sup>                     | ---                            | 1                        | 1                       | 1                      |
| 3-4 years                                  | ---                            | 0.952 (0.823-1.101)      | 1.001 (0.865-1.157)     | 1.024 (0.887-1.183)    |
| ≥5 years                                   | ---                            | 0.986 (0.825-1.178)      | 1.029 (0.862-1.229)     | 1.024 (0.859-1.222)    |
| Area of residence                          |                                |                          |                         |                        |
| Northern Italy <sup>a</sup>                | 1                              | 1                        | 1                       | 1                      |
| Central Italy                              | 1.019 (0.837-1.241)            | 1.039 (0.856-1.261)      | 1.026 (0.846-1.245)     | 1.039 (0.858-1.259)    |
| Southern Italy                             | 1.059 (0.838-1.339)            | 1.068 (0.848-1.346)      | 1.046 (0.831-1.317)     | 1.078 (0.859-1.353)    |
| Age                                        |                                |                          |                         |                        |
| Young adults (aged 21–40) <sup>a</sup>     | 1                              | 1                        | 1                       | 1                      |
| Adults (aged 41–60)                        | 0.999 (0.717-1.390)            | 1.044 (0.750-1.454)      | 1.032 (0.744-1.431)     | 1.043 (0.752-1.446)    |
| Over 60 aged                               | 0.988 (0.692-1.410)            | 0.960 (0.671-1.374)      | 0.990 (0.695-1.410)     | 1.062 (0.747-1.510)    |
| Marital status                             |                                |                          |                         |                        |
| Never married <sup>a</sup>                 | 1                              | 1                        | 1                       | 1                      |
| Widowed                                    | 0.999 (0.628-1.589)            | 0.944 (0.593-1.504)      | 0.976 (0.607-1.569)     | 0.996 (0.631-1.570)    |
| Separated/divorced                         | 1.053 (0.792-1.400)            | 1.045 (0.791-1.380)      | 1.120 (0.850-1.478)     | 1.077 (0.819-1.418)    |
| Married                                    | 0.992 (0.847-1.162)            | 0.956 (0.819-1.115)      | 1.000 (0.856-1.168)     | 0.986 (0.846-1.150)    |
| Education level                            |                                |                          |                         |                        |
| First level <sup>a</sup>                   | 1                              | 1                        | 1                       | 1                      |
| Second level                               | 1.001 (0.744-1.347)            | 0.977 (0.726-1.315)      | 1.050 (0.777-1.419)     | 0.998 (0.747-1.332)    |
| Higher education                           | 1.032 (0.762-1.398)            | 1.003 (0.740-1.359)      | 1.133 (0.832-1.541)     | 1.073 (0.798-1.444)    |
| Triple-negative breast cancer              |                                |                          |                         |                        |
| No <sup>a</sup>                            | 1                              | 1                        | 1                       | 1                      |
| Yes                                        | 1.055 (0.776-1.435)            | 1.179 (0.884-1.572)      | 1.003 (0.738-1.364)     | 1.106 (0.825-1.483)    |

<sup>a</sup>Reference category.
